# Supplementary material for: What Is the Role of Nutritional Supplements in Support of Total Hip Replacement and Total Knee Replacement Surgeries? A Systematic Review
Source: PubMed Central journal article supplement (PMC6073268; doi:10.3390/nu10070820), 2018-06-25
Supplement: nutrients-10-00820-s001.pdf [file nutrients-10-00820-s001.pdf]

| Study                                     | Bias                       |                        |                                        |                                |                         |                     |            |
|-------------------------------------------|----------------------------|------------------------|----------------------------------------|--------------------------------|-------------------------|---------------------|------------|
|                                           | Random sequence generation | Allocation concealment | Blinding of participants and personnel | Blinding of outcome assessment | Incomplete outcome data | Selective reporting | Other bias |
| Alito and de Aguilar-Nascimento 2016 [20] | +                          | +                      | -                                      | -                              | +                       | +                   | +          |
| Aronsson et al. 2008 [21]                 | +                          | +                      | +                                      | -                              | +                       | +                   | +          |
| Dreyer et al. 2013 [22]                   | +                          | +                      | +                                      | +                              | +                       | +                   | -          |
| Hartzen et al. 2012 [23]                  | +                          | +                      | +                                      | -                              | +                       | +                   | +          |
| Ljunggren and Hahn 2012 [24]              | +                          | +                      | -                                      | -                              | +                       | +                   | +          |
| Nishizaki et al. 2015 [25]                | +                          | -                      | -                                      | -                              | +                       | +                   | -          |
| Nygren et al. 1999 [26]                   | +                          | +                      | +                                      | +                              | +                       | +                   | +          |
| Soop et al. 2001 [27]                     | +                          | +                      | +                                      | -                              | +                       | +                   | +          |
| Soop et al. 2004 [28]                     | +                          | +                      | +                                      | +                              | +                       | +                   | +          |

Table S1: Risk-of-bias assessments for included studies.

Key: + Low risk of bias - High risk of bias
